# Supplementary material
Source: publisher figshare collection journal article supplement (https://karger.figshare.com/ndownloader/files/20324742)
Supplement: Supplementary file 1 [file 20324742]

**Supplement Table 1.** Baseline characteristics of the study population with and without history of urinary tract infection (specified into two groups with urinary tract infection without history of hospitalization and acute pyelonephritis treated under hospitalization)

| Characteristics | UTI (-)  (n=348,015) | UTI (+) | | | P-value |
| --- | --- | --- | --- | --- | --- |
| UTI without hospitalization  (n=17,468) | | APN  (n=2,467) |
| Maternal age at delivery (years) | 31.5±3.7 | 31.2±3.8 | 31.2±3.9 | | <.0001 |
| Primiparity (%) | 66.7 | 75.4 | 70.3 | | <.0001 |
| Multiple pregnancy (%) | 1.7 | 1.6 | 1.9 | | 0.34 |
| Smoking status (%) |  |  |  | | 0.001 |
| Never | 92.9 | 92.3 | 93.2 | |  |
| Ever | 3.7 | 3.8 | 3.3 | |  |
| Current | 3.4 | 4.0 | 3.5 | |  |
| Previous history of APN treatment | 1.3 | 1.3 | 11.3 | | <.0001 |
| Previous history of UTI without hospitalization | 9.7 | 0 | 15.9 | | <.0001 |
| BMI (kg/m2) | 21.1±2.9 | 21.2±3.0 | 21.0±3.0 | | <.0001 |
| Obesity (%) | 9.3 | 10.2 | 9.1 | | 0.0002 |
| Systolic BP (mmHg) | 110±11 | 111±11 | 110±11 | | <.0001 |
| Diastolic BP (mmHg) | 69±8 | 70±8 | 69±8 | | <.0001 |
| Hemoglobin (g/dL) | 12.9±1.0 | 13.0±1.0 | 12.9±1.0 | | 0.02 |
| Fasting glucose (mg/dL) | 88±11 | 88±12 | 88±14 | | 0.23 |
| Total cholesterol (mg/dL) | 177±31 | 177±33 | 176±31 | | 0.19 |
| Creatinine (mg/dL) | 0.9±0.8 | 0.8±0.8 | 0.9±0.9 | | 0.02 |
| AST (IU/L) | 19±11 | 19±9 | 19±7 | | 0.48 |
| ALT (IU/L) | 15±16 | 15±12 | 15±12 | | 0.61 |
| GGT (IU/L) | 16±13 | 16±13 | 17±16 | | <.0001 |

Results are presented as mean ± standard deviation or as n (%). Abbreviations: UTI, urinary tract infection; APN, acute pyelonephritis; BP, blood pressure; BMI, body mass index; AST, a[spartate aminotransferase](https://www.google.co.kr/url?sa=t&rct=j&q=&esrc=s&source=web&cd=1&cad=rja&uact=8&ved=0ahUKEwipxf3thrjVAhXLk5QKHVrOCzMQFggmMAA&url=http%3A%2F%2Fwww.webmd.com%2Fdigestive-disorders%2Faspartate-aminotransferase-ast&usg=AFQjCNE5OgqJzfEVvOrkCupGTne1lNWpBQ); ALT, alanine aminotransferase; GGT, [gamma-glutamyl transferase](https://www.google.co.kr/url?sa=t&rct=j&q=&esrc=s&source=web&cd=1&cad=rja&uact=8&ved=0ahUKEwj8leSQh7jVAhVBpZQKHWSrCwsQFggmMAA&url=https%3A%2F%2Flabtestsonline.org%2Funderstanding%2Fanalytes%2Fggt%2Ftab%2Ftest%2F&usg=AFQjCNH3sQJAHW5SLa3QNgn3g_nUlg_HdA)
